# Supplementary material for: Probing into the effect of heterojunctions between Cu/Mo2C/Mo2N on HER performance
Source: Royal Society of Chemistry journal article supplement (doi:10.1039/c9cy02526j), 2020-01-01
Supplement: c9cy02526j1.pdf [file c9cy02526j1.pdf]

# **Probing into the effect of heterojunctions between Cu/Mo<sub>2</sub>C/Mo<sub>2</sub>N on HER performance**

Rajinder Kumar,<sup>a</sup> Zubair Ahmed,<sup>a</sup> Harwinder Kaur,<sup>a</sup> Chandan Bera,<sup>a</sup> Vivek Bagchi<sup>a \*</sup>

<sup>a</sup> *Institute of Nano Science and Technology, Phase-10, Sector-64, Mohali, Punjab 160062, India*

**Supporting information**

## **List of Contents**

- S1. Detailed procedure for catalysts synthesis**
- S2. PXRD of MoCat-CN, Mo<sub>2</sub>C, Mo<sub>2</sub>N, and RGO**
- S3. Rietveld Refinement**
- S4. BET analysis of CuMoCat**
- S5. XPS Survey spectrum of CuMoCat**
- S6. Deconvoluted peak parameters of the XPS analysis**
- S7.1. Electrochemical Study of CuMoCat1, CuMoCat2, and CuMoCat3**
- S7.2. Table for electrochemically measured kinetic parameters**
- S7.3. Durability test**
- S 8. Theoretical Studies**

## **S1. Detailed procedure for catalysts synthesis**

### **1. Synthesis of precursors**

#### **a. Synthesis of RGO**

Graphite flakes have been used to synthesize GO by the modified Hummer method. The obtained GO was further thermally exfoliated at 900 °C for 15 minutes in Argon environment with a flow rate of 30 mL/min. This thermally exfoliated RGO was further used as a carbon source in the synthesis of catalysts.

#### **b. Synthesis of Mo precursor**

The Mo precursors has been synthesized with 0.025 mol (1.5 gm) of Urea  $(\text{NH}_2)_2\text{CO}$  and 1 mmol (12.358 gm) of ammonium molybdate tetrahydrate  $((\text{NH}_4)_6\text{Mo}_7\text{O}_{24} \cdot 4\text{H}_2\text{O})$  dissolved into 20 mL ammonia solution (25%) and stirred till it become transparent. The pH of the solution has been optimised to 1-2 by addition of acetic acid. This solution mixture (Mo-X) was further used for synthesis of CuMoCat1, CuMoCat2 and CuMoCat3.

While for synthesis  $\text{Mo}_2\text{C}$  and  $\text{Mo}_2\text{N}$  this solution mixture has been hydrothermally heated at 180 °C for 24 hr and dried (Mo-Y).

#### **c. Synthesis of Mo-Cu-rGO precursor**

A Mo-Cu-rGO was prepared by mixing of as obtained Mo-X solution precursor with 50 ml ethanolic solution of copper nitrate and 200 mg of rGO. Here, 0.05 mmol for CuMoCat1, 0.3 mmol for CuMoCat2 and 0.5 mmol for CuMoCat3 copper nitrate have been used to prepare Mo-Cu-rGO precursor of different copper concentration followed

by the sonication for 2 h. The obtained dispersion transferred into a hydrothermal bomb and heated at 180 °C for 24 h and dried.

## **2. Synthesis of catalyst**

### **a. Synthesis of Mo<sub>2</sub>C**

The 200 mg of Mo precursor (Mo-Y) with 300 mg of rGO was mixed with mortar pestle and kept in the quartz tube of the tubular furnace. The precursor was heated for 2 h at 720 °C temperature in an argon atmosphere with a flow rate of 30 mL/min.

### **b. Synthesis of Mo<sub>2</sub>N**

The Mo<sub>2</sub>N is obtained by annealing the mixture of 200 mg of Mo precursor (Mo-Y) and 100 mg of rGO by crushing it in mortar pestle and kept it in furnace tube in ammonia atmosphere for 2 h at 600 °C with a flow rate of 20 mL/min.

### **c. Synthesis of MoCat-CN**

The 200 mg of Mo precursor (Mo-Y) with 300 mg of rGO was mixed with mortar pestle and kept in the sealed quartz tube of the tubular furnace. The precursor was heated for 1 h at 600 °C temperature in ammonia environment with a flow rate of 20 mL/min and 2 h at 720 °C temperatures in argon atmosphere with a flow rate of 30 mL/min.

### **d. Synthesis of CuMoCat1, CuMoCat2, and CuMoCat3**

The CuMoCat1, CuMoCat2 and CuMoCat3 catalyst has been synthesized by mixing of 200 mg of respective Mo-Cu-rGO precursor as mentioned in section 1c above with 500 mg of rGO in mortar pestle and kept in quartz tube of tubular furnace. The precursor was heated for 1 h at 600 °C temperature in ammonia environment with a

flow rate of 20 mL/min and 2 h at 720 °C temperatures in argon atmosphere with a flow rate of 30 mL/min.

**Note:** The heating rate during the annealing was kept at 5 °C/min in all the reactions

## S2. PXRD of MoCat-CN, Mo<sub>2</sub>C, Mo<sub>2</sub>N and RGO

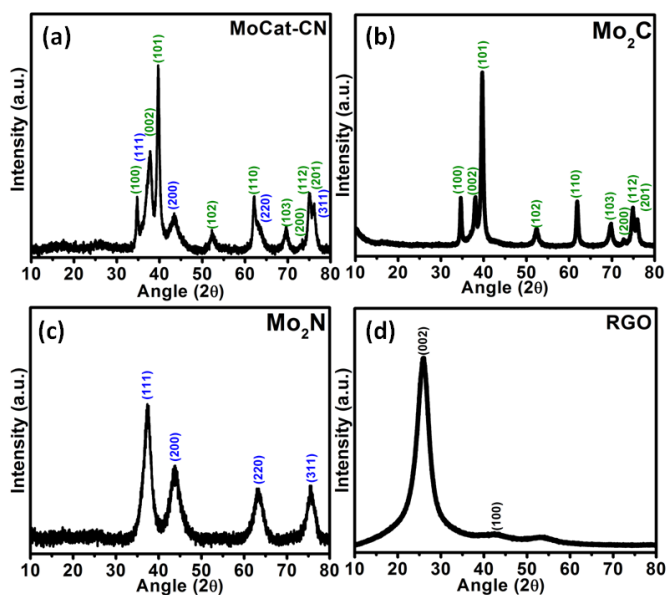

Figure S1. PXRD of (a) MoCat-CN consist of Mo<sub>2</sub>C and Mo<sub>2</sub>N phases (b) Mo<sub>2</sub>C (c) Mo<sub>2</sub>N and (d) RGO

## S3. Rietveld Refinement

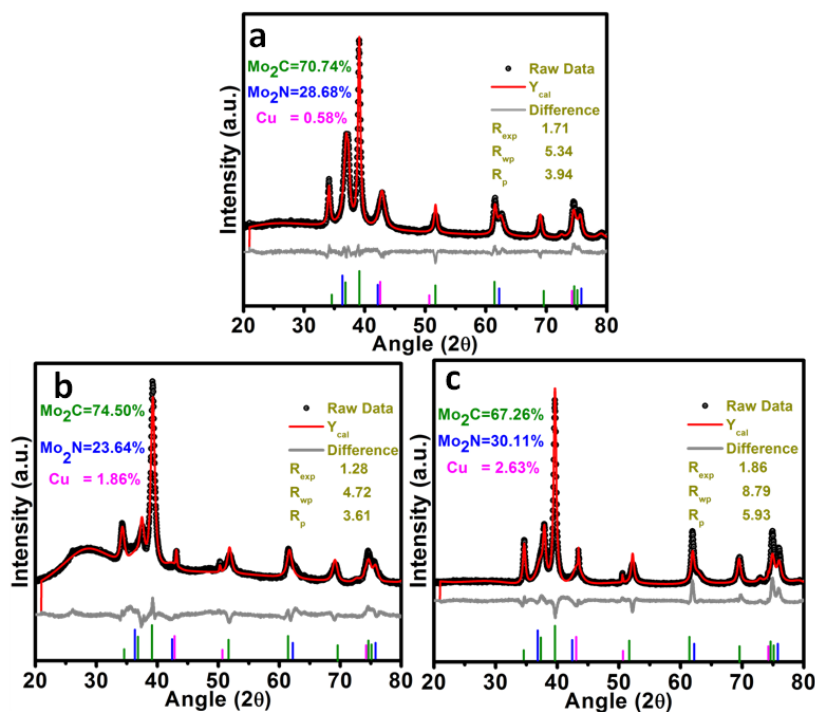

Figure S2. Rietveld refinement of (a) CuMoCat1, (b) CuMoCat2 and (c) CuMoCat3 catalyst. Rietveld analysis of catalyst shows a composition 0.58 %, 1.86 % and 2.63 % of Cu in the CuMoCat1, CuMoCat2 and CuMoCat3 catalyst respectively. The figure typically shows existence of all three  $\text{Mo}_2\text{C}$ ,  $\text{Mo}_2\text{N}$ , and Cu phases.

#### S4. BET analysis of CuMoCat

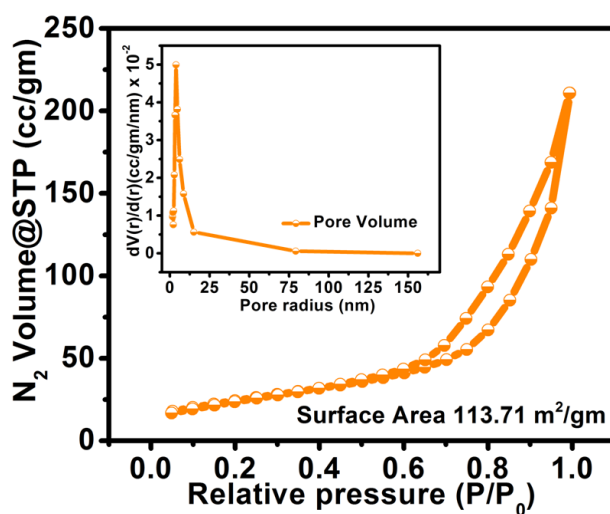

Figure S3. Nitrogen adsorption-desorption BET isotherms and inset showing BJH pore size distribution. The curve represents the mesoporous structure of the catalyst.

## S5. XPS Survey spectrum of CuMoCat

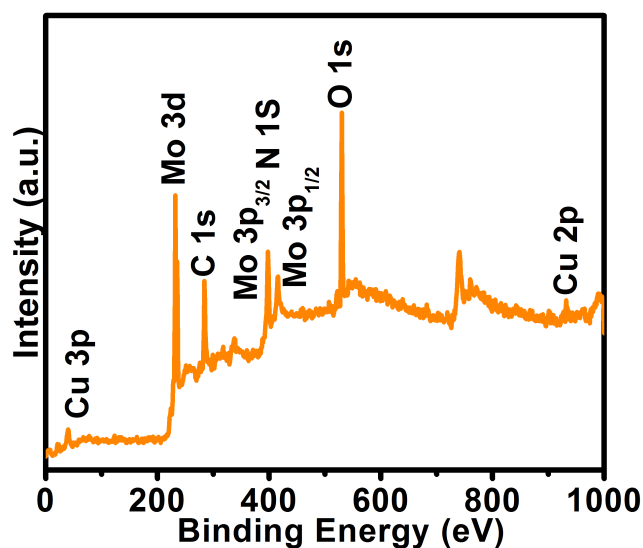

Figure S4. XPS wide angle spectrum of CuMoCat catalyst. The spectrum consists of peaks at binding energy corresponds to Mo, C, N and Cu elements present in the CuMoCat catalyst.

## S6. Deconvoluted peak parameters of the XPS analysis

| Element | Peak              | BE (eV)         | FWHM            | Area (%)        |
|---------|-------------------|-----------------|-----------------|-----------------|
| Mo 3d   | Mo <sup>2+</sup>  | 228.5 and 231.6 | 1.613 and 1.613 | 6.82 and 16.43  |
|         | Mo <sup>6+</sup>  | 232.4 and 235.5 | 1.734 and 1.734 | 37.68 and 39.05 |
| C 1s    | Mo <sub>2</sub> C | 284.2           | 1.671           | 61.55           |
|         | C-N               | 285.3           | 3.317           | 38.44           |
| N 1s    | Mo <sub>2</sub> N | 395.4           | 2.674           | 23.65           |
|         | N-C               | 398.1           | 2.638           | 51.32           |
|         | N-Q               | 401.2           | 2.312           | 25.03           |
| Cu 2p   | Cu <sup>+</sup>   | 932.6           | 2.391           | 56.26           |
|         | Cu <sup>2+</sup>  | 933.7           | 3.034           | 43.73           |

Table S1. Table showing the existing elements with corresponding deconvoluted peaks positions and FWHM values.

### S7.1. Electrochemical Study of CuMoCat1, CuMoCat2 and CuMoCat3

From the polarisation curve, the measured overpotential value of CuMoCat1, CuMoCat2 and CuMoCat3 are 112, 147 and 163 mV respectively.

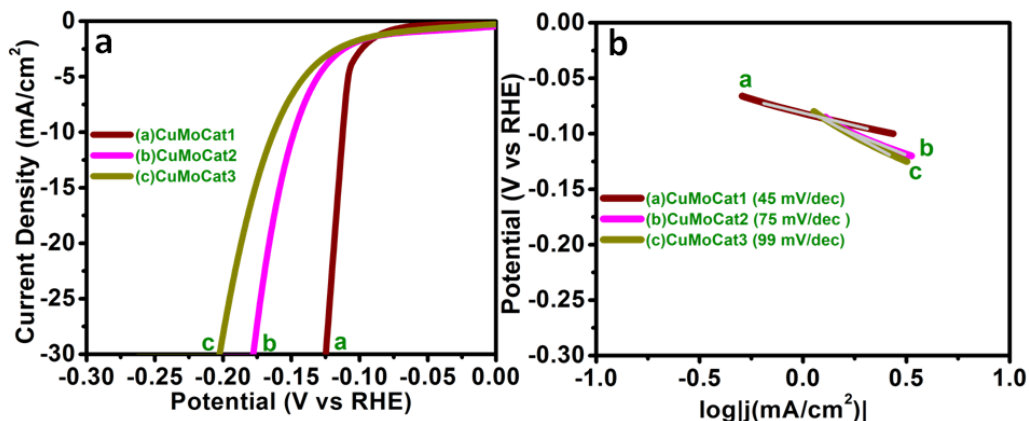

Figure S5. (a) Polarization curves and corresponding (b) Tafel slope of CuMoCat1, CuMoCat2 and CuMoCat3 catalysts in 0.5 M H<sub>2</sub>SO<sub>4</sub> solution.

### S7.2. Table for electrochemically measured kinetic parameters

| Catalyst          | Onset<br>(vs RHE) | $\eta_{10}$<br>(vs RHE) | $\eta_{20}$<br>(vs RHE) | $\eta_{30}$<br>(vs RHE) | Tafel Slope<br>(mV/dec) | Exchange<br>Current Density<br>(mA/cm <sup>2</sup> ) |
|-------------------|-------------------|-------------------------|-------------------------|-------------------------|-------------------------|------------------------------------------------------|
| CuMoCat           | 40 mV             | 82 mV                   | 101 mV                  | 112 mV                  | 33                      | $3.12 \times 10^{-2}$                                |
| CuMoCat1          | 77 mV             | 112 mV                  | 119 mV                  | 125 mV                  | 45                      | $2.97 \times 10^{-2}$                                |
| MoCat-CN          | 26 mV             | 127 mV                  | 182 mV                  | 217 mV                  | 111                     | $2.43 \times 10^{-3}$                                |
| CuMoCat2          | 78 mV             | 147 mV                  | 166 mV                  | 178 mV                  | 75                      | $1.96 \times 10^{-3}$                                |
| CuMoCat3          | 75 mV             | 163 mV                  | 186 mV                  | 202 mV                  | 99                      | $1.09 \times 10^{-3}$                                |
| Mo <sub>2</sub> C | 233 mV            | 294 mV                  | 320 mV                  | 340 mV                  | 64                      | $1.17 \times 10^{-4}$                                |

Table S2. Table showing all electrochemical kinetic parameters of all the electrocatalysts



### S7.3 Durability test

The long term stability of CuMoCat is performed and shown below.

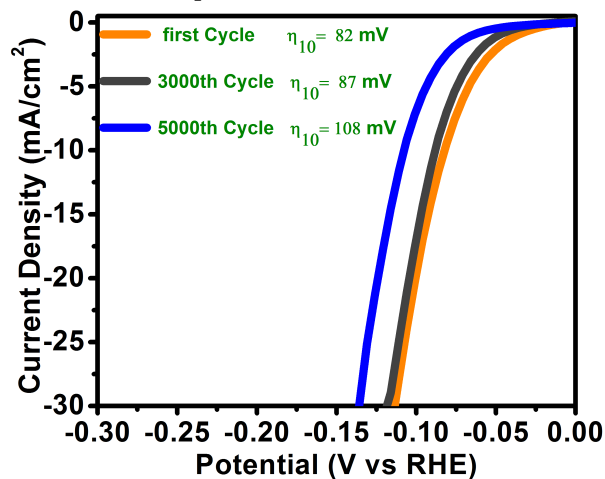

Figure S6: LSV stability curve of CuMoCat catalyst

The stability of the catalyst after 5000 cycles are shown in the above figure and was found to shift from 87 mV to 108 mV.

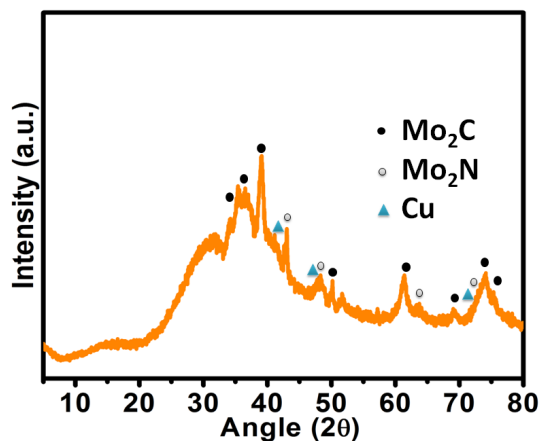

Figure S7: XRD pattern of CuMoCat catalyst after stability performing 5000 LSV Cycles in 0.5 M H<sub>2</sub>SO<sub>4</sub>

### S.8. Theoretical Studies

Vienna Ab-initio Simulation Package (VASP) with projector-augmented wave (PAW) method and the Perdew, Burke, and Ernzerhof (PBE) exchange-correlation functional version

of the generalized gradient approximation (GGA) is used for the relaxed ground states and adsorption energy calculation. Supercell of the heterostructure has 128 atoms and dimensions  $a=8.50$  Å,  $b=24.58$  Å and  $c=16.17$  Å. Heterostructure is shown in Fig. S6.

Separate calculation is performed for the  $\text{Mo}_2\text{C}$  and  $\text{Mo}_2\text{N}$  slab with 24 atoms and 28 atoms respectively. The dimension of  $\text{Mo}_2\text{C}$  is  $a=9.50$  Å,  $b=18.22$  Å and  $c=5.24$  Å and  $\text{Mo}_2\text{N}$  is  $a=8.52$  Å,  $b=4.26$  Å and  $c=24.26$  Å. Structure relaxation is performed using PAW method and PBE exchange-correlation functional as implemented in VASP with k-point mesh  $5\times 5\times 1$ . The obtained bond length and adsorption energy for the  $\text{Mo}_2\text{C}$  and  $\text{Mo}_2\text{N}$  individual slab is listed in Table. S3 and S4. Individual  $\text{Mo}_2\text{C}$  or  $\text{Mo}_2\text{N}$  slab has comparatively higher absorption energy compare to heterostructure at Mo/C/N sites.

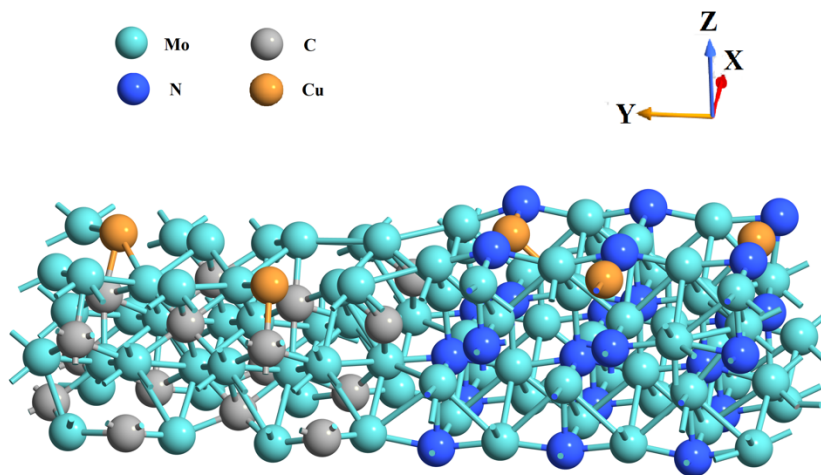

**Figure S8.** Structure figure showing Cu is dopped both in  $\text{Mo}_2\text{N}$  and  $\text{Mo}_2\text{C}$  site.

**Table S3.**

| Adsorption site<br>on Mo <sub>2</sub> N<br>(doped/undoped) | Bond length (Å) |              | $\Delta E_{\text{ads}}$ (eV) |               | $\Delta G$ (eV) |               |
|------------------------------------------------------------|-----------------|--------------|------------------------------|---------------|-----------------|---------------|
|                                                            | doped           | undoped      | doped                        | undoped       | doped           | undoped       |
| <b>Mo</b>                                                  | <b>1.78</b>     | <b>1.753</b> | <b>-0.268</b>                | <b>-0.572</b> | <b>-0.028</b>   | <b>-0.332</b> |
| <b>N</b>                                                   | <b>1.031</b>    | <b>1.039</b> | <b>0.274</b>                 | <b>0.5914</b> | <b>0.514</b>    | <b>0.8314</b> |
| <b>Cu</b>                                                  | <b>1.478</b>    | <b>-</b>     | <b>0.817</b>                 | <b>-</b>      | <b>1.057</b>    | <b>-</b>      |

**Table S4.**

| Adsorption site<br>on Mo <sub>2</sub> C<br>(doped/undoped) | Bond length (Å) |              | $\Delta E_{\text{ads}}$ (eV) |               | $\Delta G$ (eV) |               |
|------------------------------------------------------------|-----------------|--------------|------------------------------|---------------|-----------------|---------------|
|                                                            | doped           | undoped      | doped                        | undoped       | doped           | undoped       |
| <b>Mo</b>                                                  | <b>1.761</b>    | <b>1.755</b> | <b>-0.2219</b>               | <b>0.0829</b> | <b>0.018</b>    | <b>0.3229</b> |
| <b>C</b>                                                   | <b>1.123</b>    | <b>1.121</b> | <b>-0.803</b>                | <b>-0.645</b> | <b>-0.563</b>   | <b>-0.405</b> |
| <b>Cu</b>                                                  | <b>1.527</b>    | <b>-</b>     | <b>0.5020</b>                | <b>-</b>      | <b>0.7420</b>   | <b>-</b>      |
